# Supplementary material
Source: MDPI journal article supplement (https://www.mdpi.com/2073-4352/9/12/642)
Supplement: s1 [file s1]

## Supplementary materials

The cif files are for the single-crystal structure refinements for the five coesite samples (R503, R663, R694, R712 and R749).

**Appendix Table 1.** Anisotropic displacement parameters ( $\text{\AA}^2$ ) for the synthetic coesite samples in this study.

|            |                                    | <b>R503</b> | <b>R663</b> | <b>R694</b>   | <b>R712</b> | <b>R749</b> |
|------------|------------------------------------|-------------|-------------|---------------|-------------|-------------|
| <b>Si1</b> | <b><math>U_{11}</math>:</b>        | 0.0066 (5)  | 0.0055 (5)  | 0.0051 (4)    | 0.0077 (4)  | 0.0073 (5)  |
|            | <b><math>U_{22}</math>:</b>        | 0.0076 (6)  | 0.0072 (5)  | 0.0034 (4)    | 0.0083 (5)  | 0.0047 (4)  |
|            | <b><math>U_{33}</math>:</b>        | 0.0074 (4)  | 0.0102 (7)  | 0.0048 (4)    | 0.0078 (4)  | 0.0086 (5)  |
|            | <b><math>U_{12}</math>:</b>        | -0.0014 (3) | -0.0009 (3) | -0.00095 (17) | -0.0012 (2) | -0.0014 (2) |
|            | <b><math>U_{13}</math>:</b>        | 0.0043 (4)  | 0.0044 (5)  | 0.0026 (3)    | 0.0030 (4)  | 0.0043 (4)  |
|            | <b><math>U_{23}</math>:</b>        | -0.0008 (3) | -0.0007 (3) | -0.00062 (17) | -0.0007 (2) | -0.0009 (2) |
|            | <b><math>U_{\text{eq}}</math>:</b> | 0.0069 (3)  | 0.0074 (4)  | 0.0043 (3)    | 0.0083 (3)  | 0.0067 (3)  |
| <b>Si2</b> | <b><math>U_{11}</math>:</b>        | 0.0066 (5)  | 0.0053 (5)  | 0.0056 (4)    | 0.0083 (4)  | 0.0075 (5)  |
|            | <b><math>U_{22}</math>:</b>        | 0.0075 (5)  | 0.0072 (5)  | 0.0034 (4)    | 0.0084 (4)  | 0.0049 (4)  |
|            | <b><math>U_{33}</math>:</b>        | 0.0063 (4)  | 0.0098 (7)  | 0.0043 (4)    | 0.0073 (4)  | 0.0075 (6)  |
|            | <b><math>U_{12}</math>:</b>        | -0.0001 (3) | -0.0003 (2) | -0.00013 (17) | -0.0002 (2) | -0.0001 (2) |
|            | <b><math>U_{13}</math>:</b>        | 0.0038 (4)  | 0.0041 (4)  | 0.0029 (3)    | 0.0035 (3)  | 0.0040 (4)  |
|            | <b><math>U_{23}</math>:</b>        | 0.0001 (3)  | 0.0000 (3)  | -0.00005 (17) | -0.0003 (2) | -0.0001 (2) |
|            | <b><math>U_{\text{eq}}</math>:</b> | 0.0065 (3)  | 0.0073 (4)  | 0.0043 (3)    | 0.0082 (3)  | 0.0066 (3)  |

|           |            |              |              |             |              |             |
|-----------|------------|--------------|--------------|-------------|--------------|-------------|
| <b>O1</b> | $U_{11}$ : | 0.0091 (15)  | 0.0084 (15)  | 0.0094 (11) | 0.0108 (12)  | 0.0114 (14) |
|           | $U_{22}$ : | 0.0070 (18)  | 0.0087 (14)  | 0.0044 (7)  | 0.0086 (13)  | 0.0053 (12) |
|           | $U_{33}$ : | 0.0127 (11)  | 0.015 (2)    | 0.0097 (10) | 0.0117 (12)  | 0.0130 (15) |
|           | $U_{12}$ : | -0.0034 (12) | -0.0018 (10) | -0.0026 (7) | -0.0024 (9)  | -0.0022 (8) |
|           | $U_{13}$ : | 0.0051 (12)  | 0.0069 (16)  | 0.0044 (9)  | 0.0035 (11)  | 0.0060 (14) |
|           | $U_{23}$ : | -0.0013 (12) | -0.0002 (11) | -0.0011 (8) | -0.0017 (10) | -0.0004 (9) |
|           | $U_{eq}$ : | 0.0098 (7)   | 0.0101 (7)   | 0.0080 (5)  | 0.0113 (6)   | 0.0100 (6)  |
| <b>O2</b> | $U_{11}$ : | 0.0112 (15)  | 0.0101 (16)  | 0.0091 (11) | 0.0123 (10)  | 0.0111 (14) |
|           | $U_{22}$ : | 0.0133 (18)  | 0.0100 (13)  | 0.0074 (10) | 0.0113 (13)  | 0.0087 (12) |
|           | $U_{33}$ : | 0.0081 (11)  | 0.014 (2)    | 0.0056 (11) | 0.0078 (12)  | 0.0094 (15) |
|           | $U_{12}$ : | 0            | 0            | 0           | 0            | 0           |
|           | $U_{13}$ : | 0.0065 (12)  | 0.0086 (17)  | 0.0040 (10) | 0.0052 (12)  | 0.0057 (13) |
|           | $U_{23}$ : | 0            | 0            | 0           | 0            | 0           |
|           | $U_{eq}$ : | 0.0101 (7)   | 0.0101 (8)   | 0.0072 (5)  | 0.0103 (6)   | 0.0094 (6)  |
| <b>O3</b> | $U_{11}$ : | 0.0098 (11)  | 0.0099 (11)  | 0.0100 (9)  | 0.0108 (9)   | 0.0099 (10) |
|           | $U_{22}$ : | 0.0111 (13)  | 0.0144 (10)  | 0.0094 (7)  | 0.0139 (10)  | 0.0107 (9)  |
|           | $U_{33}$ : | 0.0126 (9)   | 0.0180 (16)  | 0.0102 (8)  | 0.0121 (9)   | 0.0145 (11) |
|           | $U_{12}$ : | 0.0017 (9)   | 0.0028 (7)   | 0.0019 (5)  | 0.0017 (7)   | 0.0022 (6)  |
|           | $U_{13}$ : | 0.0077 (9)   | 0.0099 (12)  | 0.0077 (7)  | 0.0062 (9)   | 0.0082 (9)  |

|           |            |              |             |             |             |             |
|-----------|------------|--------------|-------------|-------------|-------------|-------------|
| <b>O4</b> | $U_{23}$ : | 0.0013 (8)   | 0.0015 (8)  | 0.0011 (5)  | 0.0014 (7)  | 0.0009 (6)  |
|           | $U_{eq}$ : | 0.0102 (5)   | 0.0128 (6)  | 0.0086 (4)  | 0.0121 (5)  | 0.0108 (5)  |
|           | $U_{11}$ : | 0.0117 (11)  | 0.0122 (11) | 0.0105 (9)  | 0.0123 (10) | 0.0124 (10) |
|           | $U_{22}$ : | 0.0121 (13)  | 0.0134 (10) | 0.0089 (7)  | 0.0155 (10) | 0.0101 (9)  |
|           | $U_{33}$ : | 0.0084 (9)   | 0.0128 (16) | 0.0055 (8)  | 0.0088 (9)  | 0.0102 (13) |
|           | $U_{12}$ : | -0.0016 (10) | -0.0024 (8) | -0.0022 (5) | -0.0028 (7) | -0.0031 (6) |
|           | $U_{13}$ : | 0.0039 (9)   | 0.0050 (11) | 0.0014 (7)  | 0.0029 (9)  | 0.0040 (10) |
| <b>O5</b> | $U_{23}$ : | -0.0014 (8)  | -0.0009 (8) | -0.0014 (5) | -0.0020 (7) | -0.0023 (6) |
|           | $U_{eq}$ : | 0.0113 (5)   | 0.0134 (6)  | 0.0094 (4)  | 0.0133 (5)  | 0.0116 (5)  |
|           | $U_{11}$ : | 0.0128 (11)  | 0.0087 (12) | 0.0094 (9)  | 0.0129 (10) | 0.0116 (11) |
|           | $U_{22}$ : | 0.0075 (14)  | 0.0088 (10) | 0.0036 (7)  | 0.0086 (9)  | 0.0054 (8)  |
|           | $U_{33}$ : | 0.0151 (9)   | 0.0166 (17) | 0.0129 (9)  | 0.0153 (9)  | 0.0139 (12) |
|           | $U_{12}$ : | -0.0012 (10) | 0.0004 (7)  | 0.0005 (5)  | -0.0001 (7) | -0.0008 (6) |
|           | $U_{13}$ : | 0.0094 (9)   | 0.0073 (12) | 0.0064 (7)  | 0.0072 (8)  | 0.0072 (10) |
|           | $U_{23}$ : | -0.0009 (8)  | -0.0003 (7) | 0.0001 (5)  | -0.0001 (7) | -0.0005 (6) |
|           | $U_{eq}$ : | 0.0108 (5)   | 0.0109 (6)  | 0.0083 (4)  | 0.0123 (5)  | 0.0100 (5)  |

---





**Appendix Table 3.** The frequencies of the OH bands by FTIR measurement at ambient temperature if not noted, as well as their temperature dependence.

| <b>R503</b>         |                                      | <b>R663</b>         |                                      | <b>R694</b>         |                                      | <b>R749</b>         |                                      |
|---------------------|--------------------------------------|---------------------|--------------------------------------|---------------------|--------------------------------------|---------------------|--------------------------------------|
| $\nu_i$             | $(\delta\nu_i/\delta T)_p$           |
| (cm <sup>-1</sup> ) | (cm <sup>-1</sup> ·K <sup>-1</sup> ) | (cm <sup>-1</sup> ) | (cm <sup>-1</sup> ·K <sup>-1</sup> ) | (cm <sup>-1</sup> ) | (cm <sup>-1</sup> ·K <sup>-1</sup> ) | (cm <sup>-1</sup> ) | (cm <sup>-1</sup> ·K <sup>-1</sup> ) |
| 3300                | 0.1663                               | 3300                | 0.0612                               | 3300                | 0.1372                               | 3300                | 0.0402                               |
| 3458                | 0.1251                               | 3458                | 0.0588                               | 3458                | 0.1112                               | 3458                | 0.1610                               |
| —                   | —                                    | 3500                | 0.0148                               | 3500                | 0.0201                               | —                   | —                                    |
| 3522                | 0.0074                               | 3523                | 0.0142                               | 3523                | 0.0189                               | 3522                | 0.0562                               |
| 3540 <sup>a</sup>   | 0.0069                               | 3538 <sup>a</sup>   | 0.0087                               | 3526 <sup>a</sup>   | 0.0576                               | 3510 <sup>a</sup>   | 0.0558                               |
| 3572                | -0.1553                              | 3572                | -0.1976                              | 3572                | -0.1005                              | 3568                | -0.0798                              |

*a*: the maximum positions for the broad humps at high temperatures around 600 K.

**Supplementary Figures:**

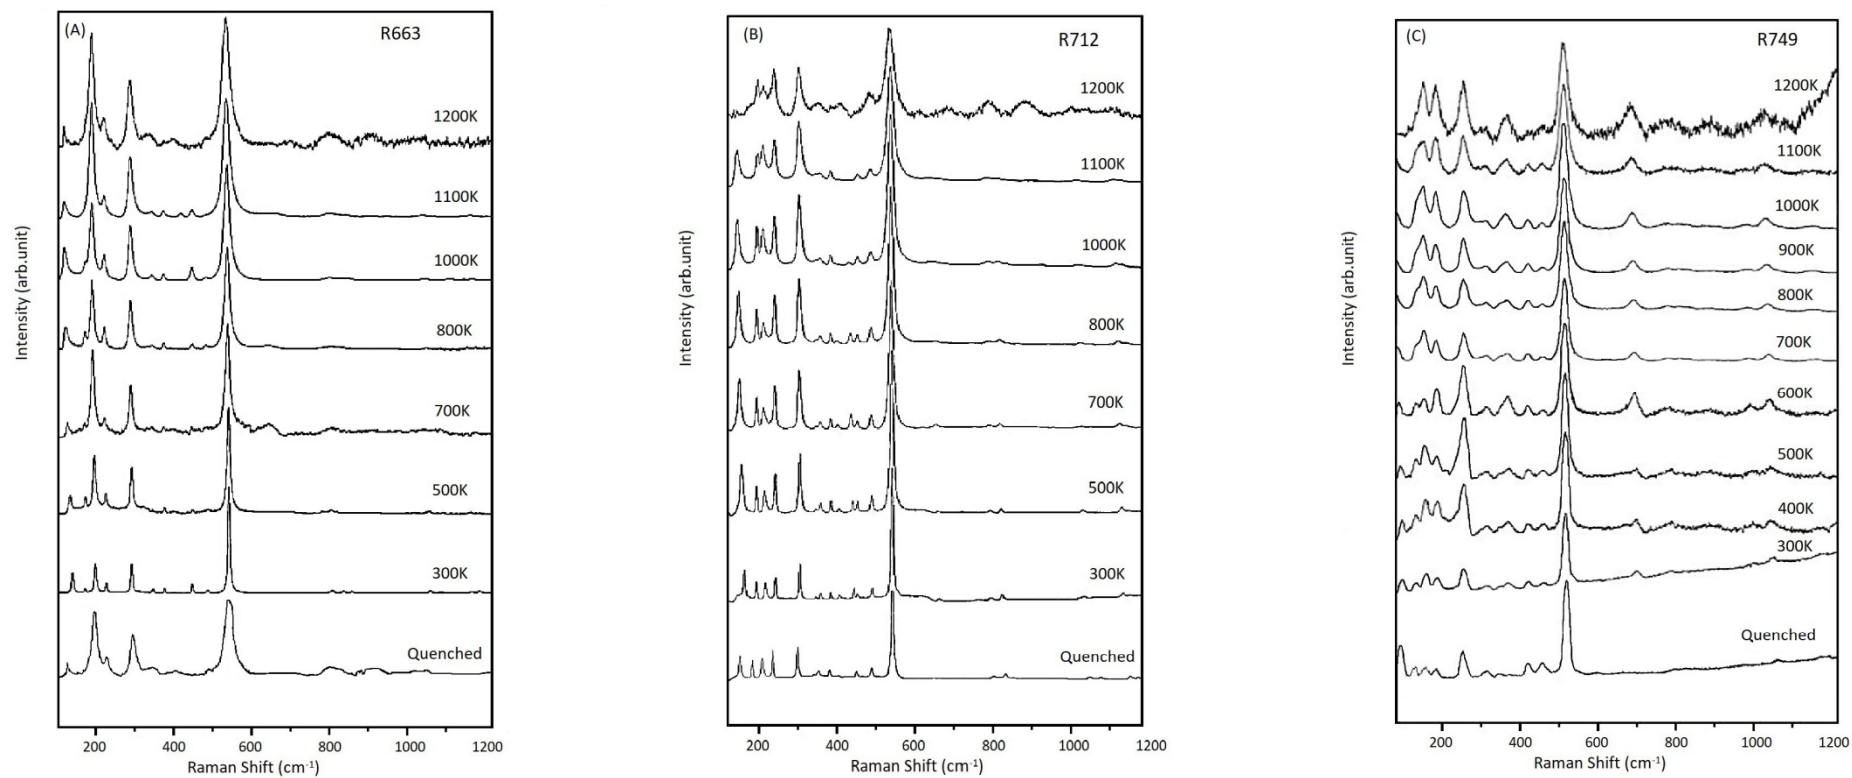

**Figure S1.** Selected high-temperature Raman spectra as well as the pattern taken when quenched to room temperature for the samples of **(A)** R663, **(B)** R712 and **(C)** R749.

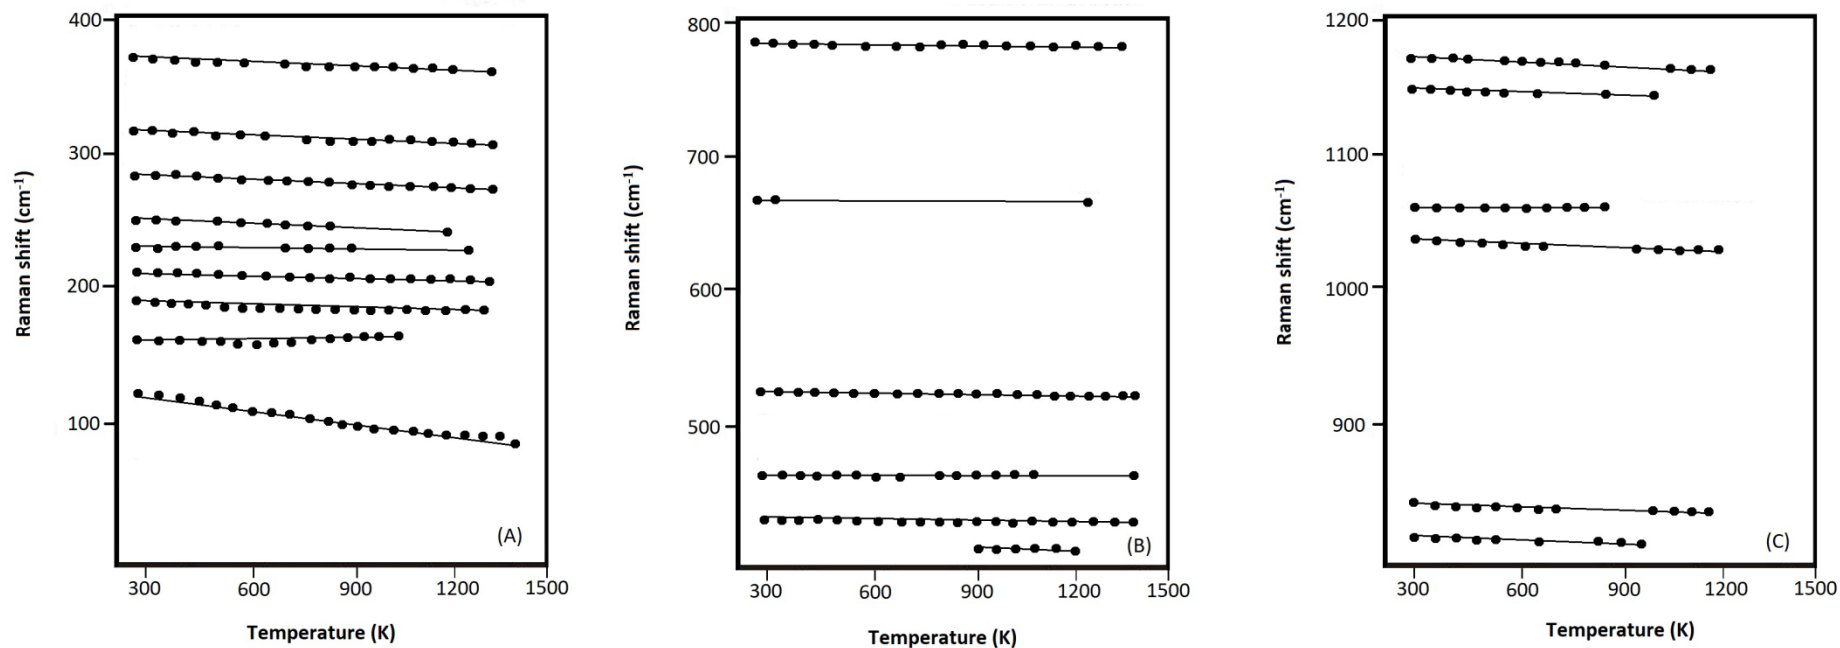

**Figure S2.** The frequencies for the Raman-active modes as a function of temperature for the sample of *R712*: (A) 0 - 400  $\text{cm}^{-1}$ , (B) 400 - 800  $\text{cm}^{-1}$  and (C) 800 - 1200  $\text{cm}^{-1}$ . Linear regression is fitted for each dataset.

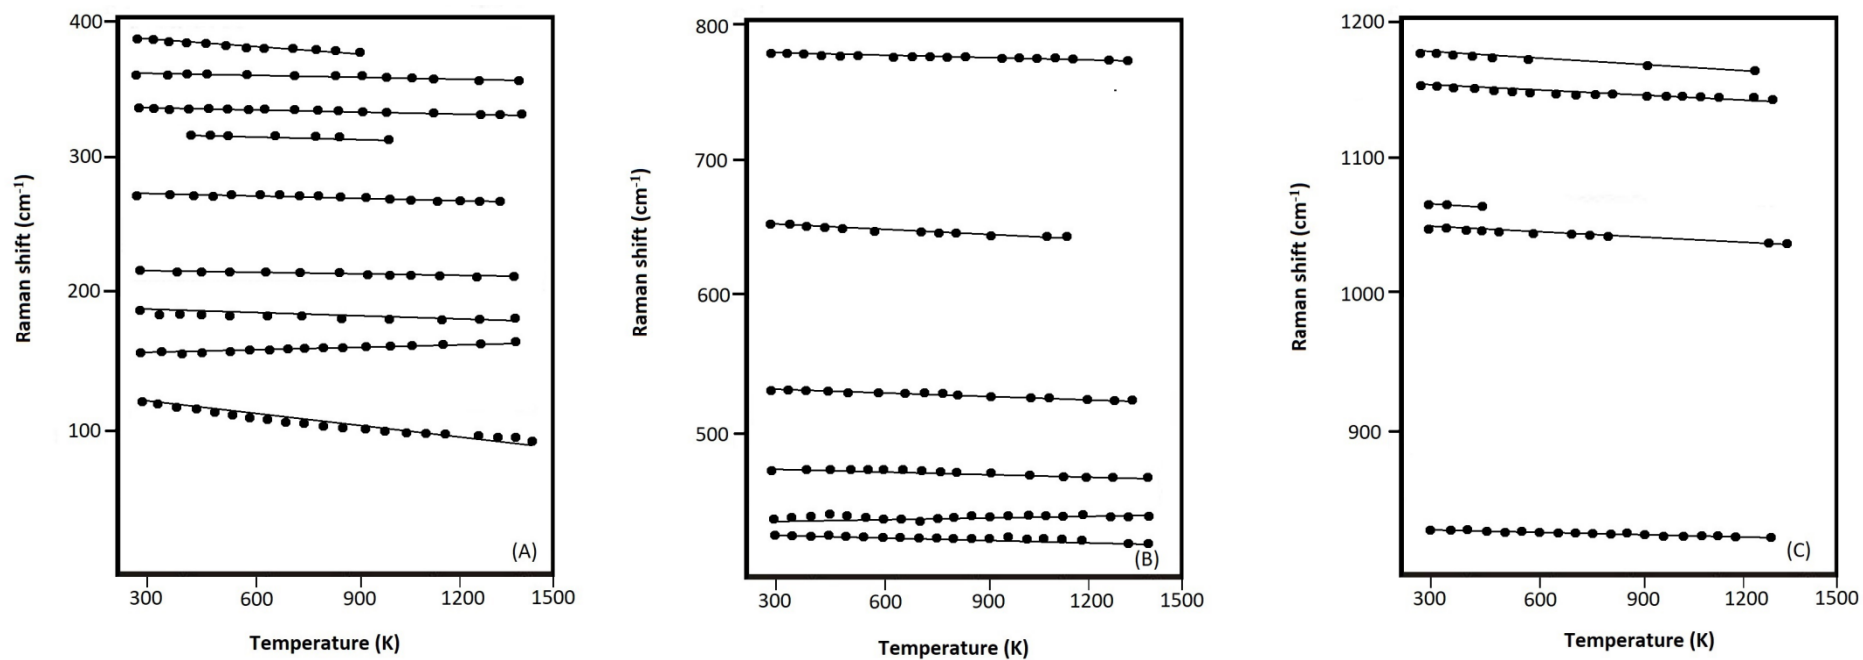

**Figure S3.** The frequencies for the Raman-active modes as a function of temperature for the sample of *R663*: (A) 0 - 400 cm<sup>-1</sup>, (B) 400 - 800 cm<sup>-1</sup> and (C) 800 - 1200 cm<sup>-1</sup>. Linear regression is fitted for each dataset.

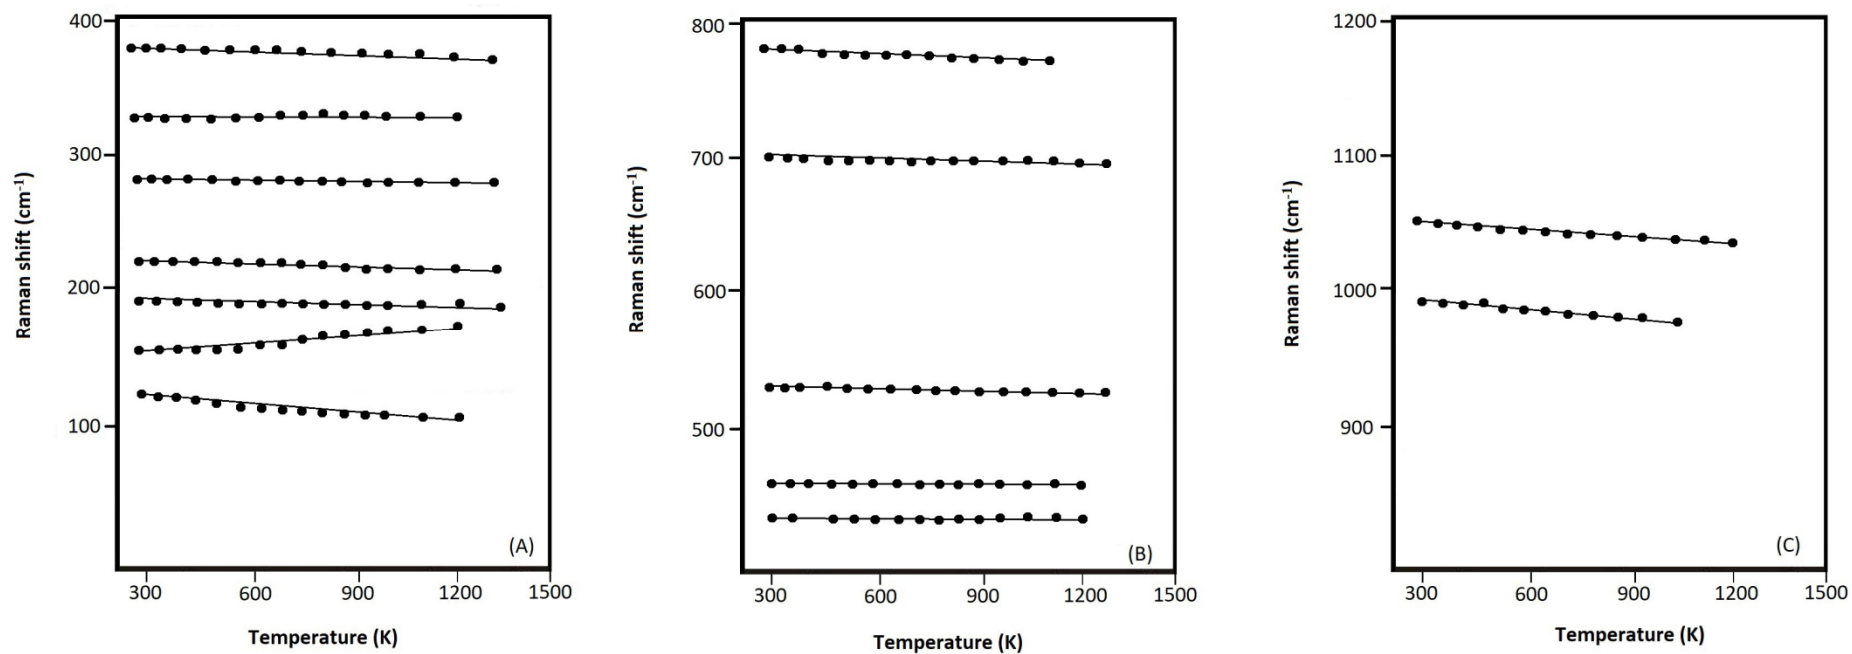

**Figure S4.** The frequencies for the Raman-active modes as a function of temperature for the sample of *R749*: (A) 0 - 400  $\text{cm}^{-1}$ , (B) 400 - 800  $\text{cm}^{-1}$  and (C) 800 - 1200  $\text{cm}^{-1}$ . Linear regression is fitted for each dataset.

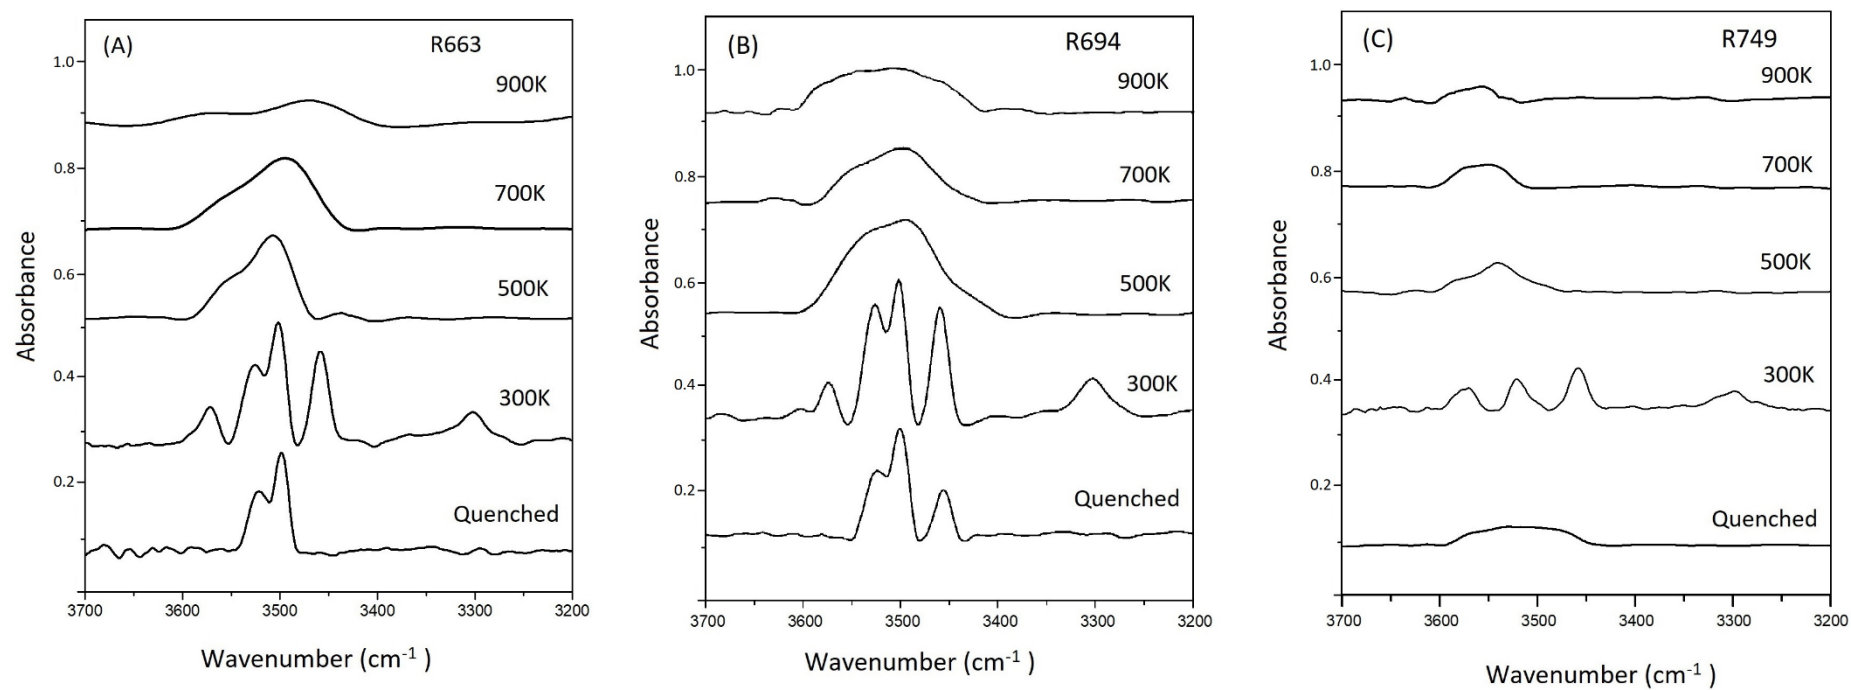

**Figure S5.** Representative FTIR spectra obtained at high temperatures as well as when quenched to room temperature for the samples of **(A)** R663, **(B)** R694 and **(C)** R749.
